# Supplementary material for: Breakfast Cereals Carrying Fibre-Related Claims: Do They Have a Better Nutritional Composition Than Those without Such Claims? Results from the Food Labelling of Italian Products (FLIP) Study
Source: MDPI journal article supplement (doi:10.3390/foods10092225), 2021-09-19
Supplement: s1 [file s1]

**Supplementary Table S1. Energy, macronutrients, and salt content across breakfast cereal types organised according to the absence or presence of fibre-related nutrition claims.**

|                |    | Energy (kcal/100 g)  | Total fat (g/100 g)   | SFA (g/100 g)        | Total carbohydrates (g/100 g) | Sugars (g/100 g)        | Fibre (g/100 g)      | Protein (g/100 g)    | Salt (g/100 g)       |
|----------------|----|----------------------|-----------------------|----------------------|-------------------------------|-------------------------|----------------------|----------------------|----------------------|
| Cereal bars    | NO | 401<br>(388–468) a   | 9.8<br>(8.2–20.0) a,b | 4.4<br>(2.4–5.2)     | 67.5<br>(56.0–70.7) a         | 27.3<br>(25.0–30.0) a   | 4.8<br>(3.5–6.6) b   | 7.2<br>(6.2–10.5) a  | 0.6<br>(0.3–0.7)     |
|                | SF | 384<br>(374–402) b   | 9.4<br>(7.3–12.0) b   | 3.9<br>(3.0–5.8)     | 67.6<br>(65.0–70.4) a         | 26.2<br>(17.5–27.7) a,b | 5.5<br>(4.9–5.9) b   | 6.3<br>(5.6–7.0) b   | 0.5<br>(0.4–0.7)     |
|                | HF | 419<br>(411–442) a   | 17.0<br>(13.5–20.0) a | 3.5<br>(2.3–4.3)     | 55.5<br>(49.0–56.5) b         | 19.0<br>(17.5–22.0) b   | 12.5<br>(7.9–14.0) a | 9.0<br>(8.0–9.7) a   | 0.3<br>(0.3–0.4)     |
| Muesli         | NO | 402<br>(388–469)     | 10.0<br>(8.2–20.0)    | 4.5<br>(2.4–5.3) a   | 67.0<br>(52.0–70.3)           | 27.0<br>(25.0–30.0)     | 4.7<br>(3.6–6.5)     | 7.3<br>(6.3–11.0)    | 0.6<br>(0.3–0.7)     |
|                | SF | 384<br>(374–402)     | 9.4<br>(7.3–12.0)     | 3.9<br>(3.0–5.8) a   | 67.6<br>(65.0–70.4)           | 26.2<br>(17.5–27.7)     | 5.5<br>(4.9–5.9)     | 6.3<br>(5.6–7.0)     | 0.5<br>(0.4–0.7)     |
|                | HF | 419<br>(411–442)     | 17.0<br>(13.5–20.0)   | 3.5<br>(2.3–4.3) b   | 55.5<br>(49.0–56.5)           | 19.0<br>(17.5–22.0)     | 12.5<br>(7.9–14.0)   | 9.0<br>(8.0–9.7)     | 0.3<br>(0.3–0.4)     |
| Flakes         | NO | 377<br>(371–385) a   | 1.5<br>(1.0–2.6) b    | 0.4<br>(0.3–0.7) b   | 81.0<br>(76.0–82.0) a         | 8.9<br>(6.1–18.5)       | 4.0<br>(3.0–5.2) b   | 8.0<br>(7.3–9.4) b   | 1.0<br>(0.5–1.6) a   |
|                | SF | 379<br>(373–385) a   | 2.0<br>(1.5–3.0) b    | 0.4<br>(0.3–1.3) a,b | 79.0<br>(76.3–81.0) a         | 15.0<br>(7.8–17.7)      | 4.5<br>(3.8–5.5) b   | 8.1<br>(7.3–9.2) b   | 0.8<br>(0.3–1.0) a   |
|                | HF | 370<br>(360–390) b   | 6.6<br>(2.5–7.0) a    | 1.2<br>(0.5–1.5) a   | 63.0<br>(58.6–68.0) b         | 7.7<br>(1.4–16.0)       | 9.9<br>(8.4–11.6) a  | 12.0<br>(9.3–12.9) a | 0.3<br>(0.0–0.8) b   |
| Bran cereals   | NO | 330<br>(311–371)     | 4.0<br>(2.7–7.0)      | 0.7<br>(0.5–2.0)     | 54.0<br>(40.0–58.0)           | 2.0<br>(2.0–3.0)        | 21.0<br>(12.0–27.5)  | 13.0<br>(12.0–13.0)  | 0.1<br>(0.0–0.1)     |
|                | SF | /                    | /                     | /                    | /                             | /                       | /                    | /                    | /                    |
|                | HF | 321<br>(309–344)     | 4.3<br>(3.5–7.3)      | 0.9<br>(0.7–1.2)     | 40.7<br>(35.0–48.0)           | 5.9<br>(1.3–17.0)       | 31.3<br>(16.0–35.0)  | 14.5<br>(13.0–16.0)  | 0.4<br>(0.0–1.3)     |
| Puffed cereals | NO | 382<br>(376–397)     | 2.8<br>(1.8–4.0)      | 0.6<br>(0.4–1.0)     | 79.0<br>(75.9–85.0)           | 11.5<br>(0.8–27.0)      | 3.0<br>(2.3–5.5) b   | 7.1<br>(6.3–9.9)     | 0.0<br>(0.0–0.6)     |
|                | SF | 377<br>(364–400)     | 3.3<br>(3.1–5.1)      | 0.5<br>(0.5–0.6)     | 77.0<br>(68.0–79.0)           | 41.0<br>(0.6–46.0)      | 5.5<br>(5.0–9.4) a,b | 7.5<br>(7.0–11.5)    | 0.0<br>(0.0–0.0)     |
|                | HF | 367<br>(365–374)     | 3.1<br>(2.9–5.0)      | 0.6<br>(0.5–0.7)     | 68.0<br>(66.0–75.9)           | 1.5<br>(0.6–15.0)       | 8.5<br>(7.0–9.4) a   | 11.0<br>(6.9–11.5)   | 0.0<br>(0.0–0.0)     |
| Others         | NO | 390<br>(385–438) a,b | 3.8<br>(2.8–12.7) b   | 1.6<br>(0.9–3.0)     | 77.5<br>(70.8–80.8) a         | 28.7<br>(25.0–30.0) a   | 3.8<br>(2.9–5.5) b   | 7.4<br>(6.4–8.0) b   | 0.7<br>(0.5–0.9) a   |
|                | SF | 390<br>(379–394) b   | 3.6<br>(2.7–5.5) b    | 1.3<br>(0.8–2.3)     | 78.0<br>(73.7–78.5) a         | 23.5<br>(21.7–25.5) a,b | 5.2<br>(4.9–5.9) b   | 8.2<br>(7.2–8.4) b   | 0.7<br>(0.4–0.8) a,b |
|                | HF | 428<br>(395–449) a   | 15.0<br>(7.4–18.0) a  | 2.2<br>(1.4–3.4)     | 63.0<br>(59.0–68.7) b         | 21.0<br>(19.0–22.9) b   | 7.8<br>(7.2–8.4) a   | 9.1<br>(8.7–10.0) a  | 0.4<br>(0.2–0.6) b   |

For each category, different lowercase letters in the same column indicate significant differences among types (Kruskal–Wallis test for independent samples with multiple pairwise comparisons or Mann-Whitney test for independent samples for bran cereal products,  $p < 0.05$ ). Legend: HF, High in fiber; NO, No fiber-related claim; SF, Source of fiber; SFA, saturates.
